# Supplementary material
Source: PubMed Central journal article supplement (PMC3149099)

**Analytical and Bioanalytical Chemistry**

**Electronic Supplementary Material**

**Alterations in discrete glutamate receptor subunits in adult mouse  
dentate gyrus granule cells following perforant path transection**

Stephen D. Ginsberg, Ph.D.

**Figure S1.** Schematic overview of the experimental design.

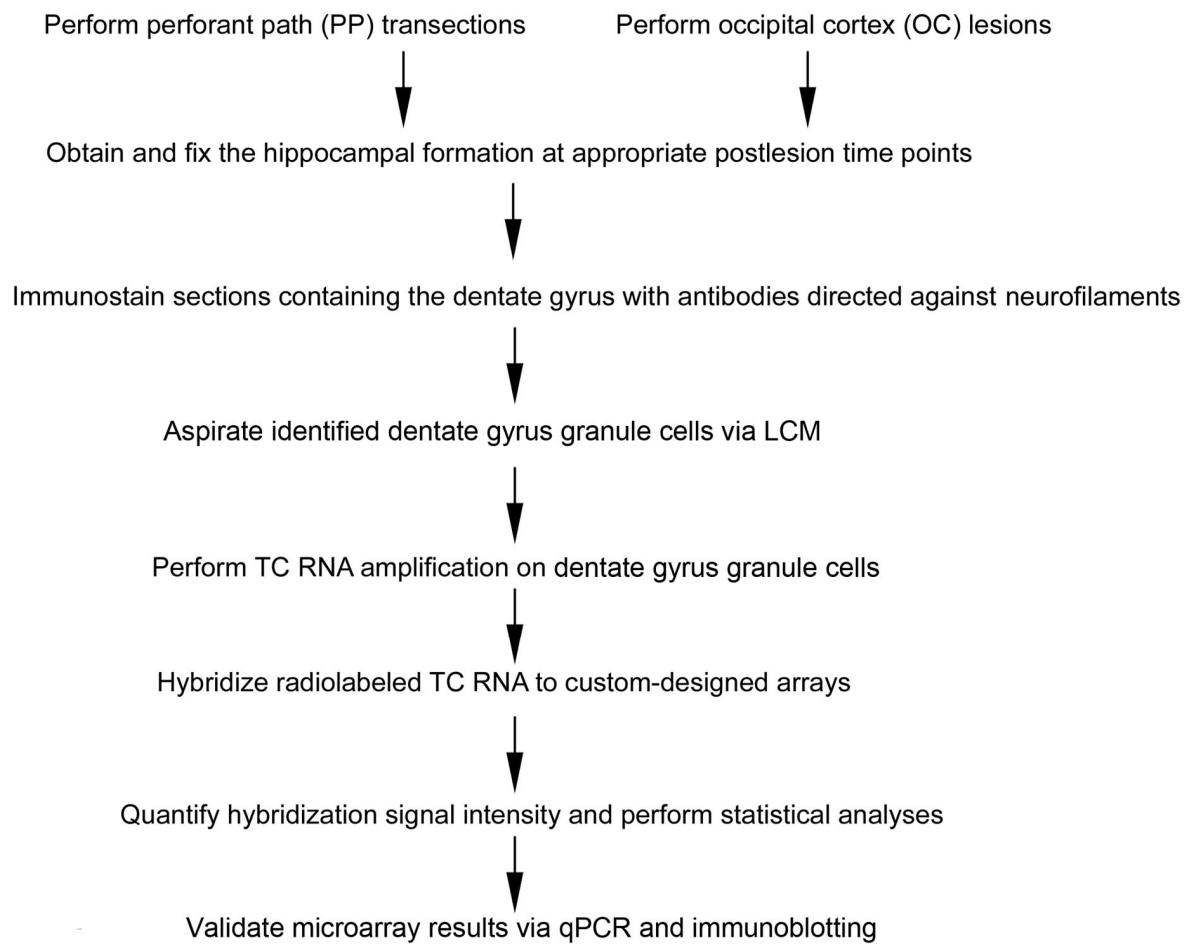

Supplement: NIHMS313380-supplement-1.pdf [file NIHMS313380-supplement-1.pdf]
